# Supplementary material for: Vectors to ore in replacive volcanogenic massive sulfide (VMS) deposits of the northern Iberian Pyrite Belt: mineral zoning, whole rock geochemistry, and application of portable X-ray fluorescence
Source: Copernicus journal article supplement (doi:10.5194/se-12-1931-2021), 2021-08-20
Supplement: Supplementary file 1 [file se-12-1931-2021-supplement.zip]

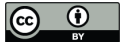

*Supplement of*

**Vectors to ore in replacive volcanogenic massive sulfide (VMS) deposits of the northern Iberian Pyrite Belt: mineral zoning, whole rock geochemistry, and application of portable X-ray fluorescence**

**Guillem Gisbert et al.**

*Correspondence to:* Guillem Gisbert (ggisbertp@hotmail.com)

- se-12-1931-2021-supplement-title-page.pdf
- Gisbert\_et\_al\_Supplementary\_materials
  - Gisbert\_et\_al\_Supplementary\_material\_1.pdf
  - Gisbert\_et\_al\_Supplementary\_material\_2.xlsx

The copyright of individual parts of the supplement might differ from the article licence.
