# Supplementary material for: Vectors to ore in replacive volcanogenic massive sulfide (VMS) deposits of the northern Iberian Pyrite Belt: mineral zoning, whole rock geochemistry, and application of portable X-ray fluorescence
Source: Copernicus journal article supplement (doi:10.5194/se-12-1931-2021), 2021-08-20
Supplement: Supplementary file 3 [file se-12-1931-2021-supplement.zip]

Archive with 4 entries (3 files):
- Gisbert_et_al_Supplementary_materials/
- Gisbert_et_al_Supplementary_materials/Gisbert_et_al_Supplementary_material_1.pdf
- Gisbert_et_al_Supplementary_materials/Gisbert_et_al_Supplementary_material_2.xlsx
- se-12-1931-2021-supplement-title-page.pdf
