# Supplementary material for: Vectors to ore in replacive volcanogenic massive sulfide (VMS) deposits of the northern Iberian Pyrite Belt: mineral zoning, whole rock geochemistry, and application of portable X-ray fluorescence
Source: Copernicus journal article supplement (doi:10.5194/se-12-1931-2021), 2021-08-20
Supplement: Supplementary file 3 [file se-12-1931-2021-supplement.zip › Gisbert_et_al_Supplementary_materials/Gisbert_et_al_Supplementary_material_2.xlsx]

## Sheet: Whole rock geochemistry
Sample	Major elements (wt %)													Volatiles (wt %)			Trace elements (µgg-1)
	SiO2	TiO2	Al2O3	Fe2O3	MnO	MgO	CaO	Na2O	K2O	P2O5	LOI	Total		C	S		Ag	As	Ba	Be	Bi	Cd	Ce	Co	Cr	Cs	Cu	Dy	Er	Eu	Ga	Gd	Ge	Hf	Ho	La	Li	Lu	Mo	Nb	Nd	Ni	Pb	Pr	Rb	Sb	Sc	Sm	Sn
AE-68/23.4	78.85	0.17	10.93	1.91	0.01	1.73	0.1	1.72	3.46	0.04	1.61	100.53		0.02	0.007		<1	<5	131	<5	<0.1	<0.2	55.2	2.1	<10	3.2	<10	7.94	5.02	0.66	15	6.75	<1	5	1.83	25.5	26	0.78	<2	6	26.5	<5	<5	6.93	96.3	0.3	6	6.3	2
AE-68/30.0	77.21	0.18	12.67	1.46	<0.01	0.57	0.27	5.38	1.73	0.04	0.82	100.33		0.049	0.044		<1	<5	159	<5	0.4	<0.2	60.4	2	15	1	20	7.58	4.72	0.84	13	6.99	1	4	1.62	28.2	<10	0.74	<2	6	29.5	<5	8	7.31	37.6	0.9	7	6.6	4
AE-68/64.0	72.41	0.2	12.48	2.16	0.07	1.96	1.77	0.1	4.5	0.04	4.49	100.18		0.659	0.009		<1	<5	361	<5	<0.1	<0.2	65.9	1.2	<10	7.7	28	8.34	5.05	0.97	16	7.73	1	5	1.77	30.2	29	0.74	<2	7	32.6	<5	<5	7.91	152	2.7	7	7	4
AE-68/101.8	66.67	0.65	15.98	6.48	0.15	2.74	0.26	1.19	2.51	0.07	3.47	100.17		0.054	0.009		<1	<5	517	<5	0.2	<0.2	52.8	10.1	74	6.3	<10	4.8	3.02	0.86	22	4.91	1	4	1.03	23.7	93	0.45	<2	12	25.6	55	5	6.17	107	0.5	13	5.1	3
AE-68/113.8	61.67	0.61	18.14	5.91	0.28	3.5	1.21	0.94	2.95	0.09	4.69	99.99		0.227	0.163		<1	6	429	<5	0.3	<0.2	101	12.9	48	8.6	108	11.12	6.45	1.72	26	10.7	2	8	2.3	46.6	136	0.98	<2	15	50.7	45	<5	12.37	136	0.3	14	10.5	6
AE-68/117.5	57.97	0.82	20.66	7.17	0.22	3.11	0.71	0.94	3.3	0.13	4.72	99.75		0.224	0.134		<1	27	441	<5	1.7	<0.2	105	20.8	90	9	88	8.8	4.92	1.81	27	9.39	2	7	1.83	48.3	140	0.73	2	16	49.5	72	7	12.25	138	0.5	18	9.7	5
AE-68/126.0	79.02	0.39	10.27	3.43	0.06	1.46	0.22	0.33	1.88	0.04	2.83	99.93		0.314	0.03		<1	8	217	<5	0.4	<0.2	55.8	7.1	53	3.7	69	3.17	1.82	0.94	13	3.88	1	2	0.65	25.5	46	0.29	<2	7	23.9	34	<5	6.02	80.3	0.1	10	4.3	2
AE-68/212.3	55.86	1.39	16.68	10.49	0.12	5.81	0.58	4.69	0.43	0.22	3.8	100.07		0.054	0.008		<1	<5	38	<5	<0.1	<0.2	18	24.4	95	2.5	<10	5.18	3.27	0.75	19	4.08	1	5	1.12	7.5	70	0.55	<2	6	10.6	18	<5	2.37	13.4	2.4	21	2.7	2
AE-68/273.5	53.95	1.25	17.48	10.09	0.14	5.01	3.18	4.45	1.34	0.34	3.15	100.38		0.06	0.015		<1	44	67	<5	<0.1	<0.2	14.3	52.9	139	2.5	<10	4.91	2.93	1.45	16	4.35	2	2	1.05	6.2	100	0.4	<2	3	12.7	53	<5	2.52	30.1	0.6	31	3.6	<1
AE-68/297.1	33.34	0.84	11.48	5.76	0.11	3.74	22.23	0.89	2.51	0.1	19.33	100.33		4.623	0.007		<1	8	40	<5	<0.1	0.3	7.9	21.5	100	3.6	76	2.57	1.63	0.69	12	2.41	1	1	0.58	3.2	69	0.23	<2	2	6.2	24	<5	1.24	45.8	0.2	22	1.8	<1
AE-68/319.5	54.06	1.32	18.14	9.9	0.06	4.08	2.76	1.2	4.77	0.01	4.75	101.05		0.345	0.006		<1	18	89	<5	<0.1	<0.2	13.2	21.9	113	6.7	<10	3.52	2.1	0.9	16	2.86	2	2	0.71	3.9	65	0.3	<2	3	8.1	38	<5	1.66	88.1	0.7	34	2.4	<1
AE-68/330.4	37.47	0.88	12.24	6.8	0.07	3.09	18.94	0.97	3.27	0.14	16.55	100.42		3.832	0.007		<1	20	88	<5	<0.1	0.3	13.6	17.3	96	5	11	3.89	2.63	1.07	12	3.84	1	1	0.91	9	45	0.34	<2	2	12.3	32	<5	2.49	67.8	0.5	23	3	<1
AE-68/334.0	43.04	1.03	14.12	8.72	0.09	3.24	12.9	0.89	4.03	0.05	12.14	100.25		2.48	<0.005		<1	16	170	<5	<0.1	0.2	14.7	20.4	99	6.2	<10	2.88	1.92	0.96	15	2.99	2	2	0.64	7.5	42	0.25	<2	3	11.1	41	<5	2.31	89.5	1.5	26	2.6	<1
AE-68/337.30	72.5	0.16	12.4	2.59	0.03	4.61	0.15	0.43	3.18	0.02	3.61	99.68		0.029	<0,005		<1	10	408	<5	0.1	<0,2	102	1.7	<10	6.3	<10	13.49	8.02	1.43	21	12.58	1	7	2.59	47.4	59	1.22	<2	12	46	<5	6	12.33	95.7	1	6	11.8	7
AE-68/347.0	69	0.2	14.44	3.93	0.01	3.4	0.92	1.2	3.23	0.03	3.12	99.48		0.087	<0.005		<1	32	427	<5	0.4	<0.2	137	1.8	<10	6.7	10	15.52	9	1.58	23	14.44	2	7	3.41	62.7	56	1.17	<2	12	57.7	<5	14	15.41	108	4.1	7	12.8	7
AE-68/354.00	70.1	0.22	15.5	2.51	0.03	2.61	1.75	1.59	1.88	0.02	3.62	99.83		0.112	<0,005		<1	5	689	<5	0.3	0.2	128	1.4	<10	4.2	<10	15.68	9.28	1.7	25	14.76	2	10	3.03	61.3	60	1.42	<2	15	57.4	<5	24	15.58	75.8	2.1	8	14	9
AE-68/367.60	75	0.17	12.7	2.31	0.02	3.31	0.67	1.52	1.05	0.02	3.44	100.21		0.099	<0,005		<1	<5	457	<5	0.2	<0,2	78	1.2	<10	2.9	<10	9.53	5.45	1.14	22	9.33	1	8	1.81	35.8	67	0.93	<2	12	35.5	<5	9	9.52	47.4	1.4	7	8.9	7
AE-68/376.60	77	0.15	11.4	2.71	0.01	2.89	0.35	1.36	1.17	0.02	3.09	100.15		0.066	<0,005		<1	<5	398	<5	<0,1	<0,2	78.2	1.6	<10	4.1	<10	11.31	7.53	1.06	27	9	2	7	2.43	36.5	59	1.09	<2	10	34.7	<5	6	9.32	56.2	0.6	6	8.3	6
AE-68/388.60	73.6	0.19	14.2	2.44	0.02	1.95	0.34	2.75	1.18	0.02	2.93	99.62		0.043	0.325		<1	8	467	<5	0.3	<0,2	117	1.4	<10	2.4	11	13.38	8.52	1.4	35	11.68	1	9	2.76	56.9	48	1.33	2	14	48.4	<5	15	13.66	48.4	1	8	11.8	8
AE-68/399.40	72.8	0.16	12.9	1.97	0.03	2.2	2.46	1.57	1.27	0.02	4.42	99.8		0.483	<0,005		<1	<5	624	<5	0.1	<0,2	100	39.3	<10	2.7	<10	14.95	9.15	1.41	22	12.47	2	8	3.09	46.4	51	1.27	15	12	45.6	<5	8	12.26	54.4	0.9	7	11.6	7
AE-68/407.80	76.7	0.15	12.2	1.96	0.02	2.41	0.5	2.62	0.56	0.01	2.65	99.78		0.064	<0,005		<1	<5	318	<5	0.1	<0,2	78.8	0.8	<10	1.4	<10	12.01	7.38	1.01	22	10.18	1	8	2.44	34.8	50	1.08	<2	11	36.9	<5	6	9.55	22.6	0.7	6	9.5	6
AE-68/420.20	74.2	0.18	13.9	2.07	0.02	3.48	0.3	2.87	0.73	0.02	3.07	100.84		0.043	<0,005		<1	<5	142	<5	<0,1	<0,2	14.9	1.7	12	1.8	<10	5.34	4.57	0.3	22	2.66	1	9	1.27	6.1	64	0.98	<2	12	6.9	<5	8	1.82	27.2	0.6	6	1.9	8
AE-68/435.30	71.9	0.18	13.8	2.35	0.01	4.14	1.17	1.4	1	0.03	4	99.98		0.111	<0,005		<1	17	284	<5	0.2	<0,2	110	1.2	<10	3.3	<10	15.17	9.51	1.66	24	13.18	2	9	3.08	52.6	76	1.44	<2	13	51.8	<5	12	13.74	43.3	2.4	7	13.1	8
AE-68/447.90	73.9	0.17	13.3	2.12	0.01	3.18	0.46	1.37	1.79	0.02	3.39	99.71		0.08	0.454		<1	<5	402	<5	0.3	<0,2	76.5	35	<10	3.2	<10	9.04	4.68	1.17	23	9.12	1	8	1.57	33.4	54	0.97	3	12	34.9	<5	11	9.35	63.3	0.6	6	8.8	7
AE-68/454.00	69.4	0.18	13.7	3.57	0.02	4.08	0.87	1.98	0.98	0.02	4.19	98.99		0.156	1.09		<1	13	332	<5	0.3	0.8	82.3	5.1	21	2.6	24	15.03	8.5	1.42	22	13.14	1	8	2.88	39.4	75	1.15	3	11	40.5	<5	20	10.32	33.3	3.4	7	11.3	8
AE-68/458.6	71.02	0.19	14.2	2.97	0.02	3.85	0.58	1.08	2.14	0.03	3.8	99.88		0.106	1.131		<1	11	594	<5	0.3	<0.2	87.5	1	<10	3.5	<10	11.17	7.61	1.21	22	9.53	1	7	2.51	38.8	65	1.14	<2	10	40.8	<5	13	10.55	61.2	1.6	7	9.4	6
AE-68/463.30	77.7	0.16	12.1	1.64	0.02	1.1	0.4	3.61	1.43	0.02	1.97	100.15		0.053	0.81		<1	16	189	<5	0.2	<0,2	77.7	1.7	28	1.9	<10	11.09	6.9	1.15	20	9.93	<1	7	2.26	35.1	17	1.05	5	11	35.6	<5	23	9.55	46.1	2.4	6	9.3	7
AE-68/473.90	74	0.14	12.1	2.07	0.03	1.72	1.23	0.42	3	0.01	4.04	98.76		0.489	1.34		<1	19	352	<5	0.2	<0,2	79.1	1.3	36	3.3	<10	11.99	7.12	1.29	21	10.15	<1	7	2.43	36.2	16	1.02	4	11	36	13	17	9.63	94.5	5.1	6	9	11
AE-68/482.10	73.6	0.18	13.9	1.92	0.02	3.55	0.05	0.55	2.36	0.02	3.43	99.58		0.009	0.179		<1	6	297	<5	0.4	<0,2	112	1.5	<10	2.3	<10	13.94	7.89	1.17	24	13.32	<1	9	2.63	52	47	1.25	4	13	51.8	<5	16	13.76	63.7	1.1	7	13.2	10
AE-68/496.90	60.9	0.18	15	2.97	0.03	13.1	0.03	0.15	0.83	0.02	6.81	100.02		0.018	0.008		<1	<5	78	<5	<0,1	<0,2	94.9	1.1	14	1.4	<10	12.89	8.07	1.1	25	11.26	<1	9	2.64	43.7	187	1.24	3	12	43.7	<5	5	11.64	23.8	0.5	7	11.1	7
AE-68/510.00	72.7	0.15	11.7	2.21	0.04	6.53	0.2	0.23	1.47	0.02	4.1	99.35		0.057	0.123		<1	26	254	<5	0.7	<0,2	83.6	1.2	16	1.4	<10	11.07	6.55	1.21	21	10.2	<1	7	2.13	38.4	72	1.01	3	11	38.4	<5	7	10.27	43.6	1.3	6	9.5	10
AE-68/521.30	74.7	0.15	11.8	2	0.05	2.46	1.48	0.43	2.38	0.01	3.62	99.08		0.31	0.752		<1	11	271	<5	0.3	<0,2	80.1	1.1	<10	2.2	<10	11.23	7.01	1.06	20	9.89	<1	7	2.29	37.1	27	1.03	3	11	37	7	13	9.79	88.4	1.5	6	9.3	6
AE-68/532.00	74.8	0.16	12.4	2.17	0.04	3.88	0.14	0.52	2.04	0.02	3.84	100.01		0.043	0.984		<1	11	172	<5	0.3	<0,2	85.9	1.2	<10	2.1	<10	12.38	7.28	1.25	21	10.53	<1	8	2.43	39.3	45	1.1	2	11	39.7	<5	14	10.52	88.8	1.4	6	10.3	7
AE-69/10.8	77.94	0.15	11.49	2.11	0.02	0.44	0.27	5.41	1.32	0.02	0.72	99.89		0.064	<0.005		<1	<5	206	<5	0.1	<0.2	78.8	0.9	28	0.7	<10	9.54	5.64	0.96	15	8.82	1	7	1.96	35.3	<10	0.82	<2	9	38.5	<5	7	9.68	22.3	0.9	6	8.3	5
AE-69/47.8	71.84	0.21	13.73	2.27	0.03	2.72	1.75	0.77	3.64	0.03	3.03	100.02		0.127	<0.005		<1	<5	353	<5	0.3	<0.2	94.3	2.2	<10	4.7	<10	12.04	7.22	1.09	19	10.81	1	8	2.55	42.1	43	1.11	<2	10	46.4	<5	10	11.62	107	0.5	8	10.2	7
AE-69/77.5	55.7	1.68	16.13	8.9	0.11	4.44	3.11	7.06	0.42	0.36	2.47	100.38		0.138	0.021		<1	11	53	<5	0.2	<0.2	33.6	16.6	21	0.6	30	7.92	4.99	1.72	20	6.73	2	4	1.72	15.6	31	0.71	<2	7	21.3	<5	6	4.62	9	0.7	32	5.4	2
AE-69/85.4	57.79	1.63	15.75	8.92	0.12	4.14	2.41	7.25	0.08	0.31	2.09	100.49		0.075	0.007		<1	<5	18	<5	0.1	<0.2	38.6	18.6	19	0.3	15	8.06	4.94	1.7	18	7.05	2	4	1.72	17.3	27	0.74	<2	8	23.6	<5	<5	5.17	1.5	0.4	30	5.8	2
AE-69/190.6	62.11	0.35	17.42	4.31	0.09	5.97	1.29	0.77	2.85	0.04	4.54	99.74		0.062	<0.005		<1	52	444	<5	0.2	<0.2	129	6.1	<10	7.9	<10	24.32	15.48	2.77	30	19.99	1	16	5.4	55.5	139	2.24	<2	21	70.7	12	16	16.48	111	10.8	6	16.8	9
AE-69/192.7	57.89	1.08	17.32	7.82	0.28	3.32	2.4	5.84	0.21	0.13	3.44	99.73		0.203	0.044		<1	8	45	<5	0.2	<0.2	28	12.8	118	0.8	227	6.78	4.01	1.38	17	6.2	2	3	1.52	13.7	103	0.52	<2	5	19.5	18	10	4.21	7.6	2	27	5	2
AE-69/199.6	47.98	1.4	20.29	10.8	1.96	3.65	2.08	4.45	2.58	0.12	4.67	99.98		0.41	0.016		<1	28	1184	<5	0.1	<0.2	16	41.7	159	6	<10	5.26	3.01	0.97	23	4.63	2	4	1.09	8.2	68	0.38	<2	5	12.7	43	12	2.71	107	8.4	34	3.5	2
AE-69/215.0	65.88	0.26	19.37	3.07	0.03	3.65	0.25	1.73	2.5	0.04	4.01	100.79		0.041	0.006		<1	28	776	<5	0.2	<0.2	105	1.4	<10	7.5	<10	16.67	10.24	1.74	25	14.6	2	10	3.61	43.3	124	1.41	<2	15	60.1	11	11	14.13	88.1	14.5	8	14.4	9
AE-69/217.00	61.1	0.25	19	5.19	0.06	4.28	0.83	1.79	2.11	0.05	5.05	99.71		0.149	<0,005		<1	11	748	<5	0.1	<0,2	120	2.3	<10	6.5	<10	12.93	7.14	1.71	32	12.51	1	12	2.44	45.7	123	1.12	<2	17	47.2	9	13	12.84	88.7	4	12	12.1	10
AE-69/218.5	66.15	0.22	16.87	4.19	0.05	4.25	0.81	2.09	1.48	0.03	4.28	100.42		0.175	0.007		<1	10	544	<5	0.2	<0.2	76.1	2.2	<10	4.7	11	12.15	7.53	1.14	27	9.82	2	9	2.59	34.4	112	1.09	<2	14	35.6	<5	12	8.64	52.1	2.8	9	8.7	8
AE-69/229.10	71	0.19	15	2.74	0.02	4.04	0.2	2.54	0.66	0.02	3.6	100.01		0.016	<0,005		<1	7	252	<5	0.1	<0,2	88	1.5	<10	2.5	<10	10.41	6.08	1.31	25	9.9	1	9	2.05	38.4	91	1.03	<2	14	39.7	<5	10	10.77	24.8	2.1	7	10.2	8
AE-69/232.5	73.56	0.15	12.66	3.42	0.02	4.48	0.21	1.45	0.91	0.02	3.41	100.29		0.04	<0.005		<1	10	359	<5	<0.1	<0.2	71.9	1.2	<10	3.1	<10	9.28	6.13	0.9	20	7.52	1	6	2.14	31.7	89	0.98	<2	11	32	<5	6	8.58	32.2	2.1	6	7.3	6
AE-69/238.60	72.3	0.17	13.3	3.36	0.02	4.23	0.3	2.23	0.97	0.03	3.45	100.36		0.033	<0,005		<1	8	351	<5	<0,1	<0,2	88.1	1	10	2.8	<10	13.44	8.07	1.35	23	11.18	1	8	2.68	40.6	77	1.26	<2	13	41	<5	8	10.92	38.3	1.8	6	10.5	8
AE-69/249.10	72.8	0.16	12.7	2.36	0.02	4.25	1.06	1.42	0.76	0.02	4.45	100		0.199	<0,005		<1	7	355	<5	0.1	<0,2	103	1.3	<10	2.5	<10	10.93	6.3	1.44	22	11.44	1	8	2.07	47.9	77	1.02	<2	11	48.4	<5	10	12.85	28.6	2	6	12.2	6
AE-69/258.60	75.6	0.15	12.5	2.16	<0,01	3.12	0.32	3.23	0.38	0.02	2.84	100.32		0.034	<0,005		<1	9	140	<5	0.1	<0,2	76.1	1	11	1.5	<10	10.33	6.38	1.12	19	9.23	1	8	2.05	34.9	54	1.14	<2	11	34.6	<5	8	9.29	12.5	1.4	6	9.3	6
AE-69/273.20	69.9	0.2	15.3	2.75	0.01	4.29	0.45	2.42	0.64	0.03	4.32	100.31		0.049	<0,005		<1	21	376	<5	<0,1	<0,2	110	1.1	<10	2.3	<10	16.34	9.91	1.6	27	13.9	1	10	3.27	51	77	1.51	<2	15	51.1	<5	9	13.6	23.4	2.5	7	13.7	9
AE-69/284.70	76	0.15	12.3	2.13	0.01	4.12	0.2	1.89	0.55	0.02	3.29	100.66		0.007	<0,005		<1	10	291	<5	<0,1	<0,2	85.2	1.1	<10	1.8	<10	10.74	6.36	1.03	21	9.34	1	7	2.16	37.7	65	1.01	<2	11	38.2	<5	7	10.32	20.4	1.8	6	9.5	6
AE-69/297.30	71.5	0.18	14.3	2.47	0.01	4.38	0.62	2.12	0.8	0.02	4.07	100.47		0.026	<0,005		<1	22	427	<5	0.1	<0,2	90.1	0.8	<10	2.7	<10	13.94	8.57	1.28	24	11.62	1	8	2.8	40.7	72	1.27	<2	12	41.9	<5	10	11.21	29.9	2.6	7	10.7	7
AE-69/309.00	74.6	0.16	12.4	1.9	0.01	4.09	0.52	3.02	0.44	0.02	2.93	100.09		0.023	<0,005		<1	11	175	<5	0.1	0.3	88	2.4	15	1.4	<10	11.28	6.86	1.31	20	11.14	1	7	2.19	39.9	57	1.08	<2	11	41.3	<5	8	10.83	13.9	1.7	6	10.8	7
AE-69/319.80	72.6	0.18	13.8	1.95	0.01	3.68	0.3	1.5	2.49	0.02	3.19	99.72		0.036	0.047		<1	6	508	<5	0.2	<0,2	92	1.3	<10	3.3	<10	13.45	8.3	1.34	23	11.73	1	8	2.74	42.3	44	1.18	<2	13	42.3	<5	7	11.22	59.2	1.4	7	11.2	8
AE-69/331.00	79.3	0.14	11.2	1.85	0.01	0.48	0.1	2.45	2.4	0.01	2.25	100.19		0.01	1.14		<1	43	332	<5	<0,1	<0,2	70.7	1.1	30	0.9	23	8.03	5.36	0.73	19	7.78	<1	7	1.64	31.3	<10	0.85	3	10	32.6	<5	34	8.62	43.1	2.9	5	8.3	4
AE-69/337.90	69.6	0.21	15.9	2.31	0.01	1.2	0.15	0.77	6.56	0.03	3.37	100.11		0.028	1.48		<1	28	315	<5	0.1	<0,2	99.4	1.3	10	2.4	15	14.52	8.97	1.59	31	12.61	<1	10	2.97	44.8	20	1.37	3	14	46.7	<5	33	12.26	120	5.3	8	12.1	11
AE-69/348.6	59.5	0.27	19.89	2.75	0.04	3.07	0.98	0.46	7.93	0.03	4.24	99.16		0.2	1.201		<1	101	287	6	0.3	<0.2	114	1.5	<10	6.2	10	15.68	10.17	2.22	32	13.44	1	11	3.44	50.4	71	1.51	<2	16	53.7	<5	20	13.62	188	15.9	10	12.5	10
AE-69/352.00	77.3	0.14	11.4	1.97	0.04	1.73	0.12	0.07	4.2	0.02	2.85	99.84		0.016	0.833		4	80	307	<5	0.3	0.9	77.5	1.2	<10	3.6	24	11.21	6.96	1.11	21	9.42	<1	7	2.24	35.5	21	1.03	2	10	35.1	<5	127	9.48	141	12.2	6	9	4
AE-69/361.10	71.1	0.19	14.9	2.51	0.05	1.67	0.17	0.49	4.89	0.01	3.38	99.36		0.038	1.07		<1	519	428	<5	0.5	1.3	104	1.7	22	4.3	366	14.8	9.03	1.44	26	12.97	<1	9	2.98	47.4	14	1.35	12	14	48.9	<5	423	12.64	169	4.2	7	12.5	5
AE-69/366.20	72.6	0.15	11.9	1.99	0.17	2.84	1.15	0.28	3.73	0.02	3.98	98.81		0.422	0.66		<1	76	352	<5	0.4	2.7	83.3	1.2	15	3.5	<10	12.05	7.37	1.14	22	10.25	<1	7	2.43	38.2	23	1.09	3	11	37.9	<5	543	10.12	131	2.4	6	10	6
AE-69/368.80	73.1	0.15	11.9	2.84	0.08	1.45	1.56	0.94	3.59	0.01	3.42	99.04		0.366	1.8		<1	62	584	<5	0.3	<0,2	79.9	1.2	17	3.3	13	11.91	7.21	1.31	21	10.68	1	7	2.36	36.4	13	1.09	3	11	36.9	<5	103	9.92	126	2.1	6	9.6	7
AE-69/372.20	68.5	0.14	10.1	4.11	0.18	2.15	3.97	0.06	3.01	0.01	5.87	98.1		0.888	2.46		<1	137	309	<5	0.2	<0,2	74	1.2	15	3	11	11.66	6.95	1.2	17	9.8	<1	6	2.27	35.4	23	0.96	3	10	33.5	<5	40	8.99	118	4.8	5	8.9	5
AE-69/384.00	74.5	0.15	11.3	2.07	0.07	2.12	0.57	0.25	3.33	0.02	3.5	97.88		0.217	1.39		<1	14	304	<5	0.3	13.7	78.9	1.1	12	2.7	104	10.98	6.83	1.01	20	9.61	<1	7	2.24	36.1	19	1.02	2	10	36.2	<5	4731	9.65	149	8.1	6	9.3	7
AE-69/387.00	80.5	0.12	9.79	2.06	0.03	1.26	0.17	0.1	2.98	0.02	2.84	99.87		0.06	1.16		<1	17	248	<5	0.2	2.1	69.4	1	29	2.4	<10	9.03	5.38	1	18	7.89	<1	6	1.79	32.2	13	0.87	3	9	31.4	<5	62	8.46	135	3.2	<5	7.7	6
AE-69/389.80	78.5	0.14	10.6	1.84	0.04	2.03	0.18	0.08	3.14	0.01	2.91	99.47		0.069	0.945		<1	11	259	<5	0.2	<0,2	73	1.2	15	2.6	<10	10.7	6.69	1.08	19	9.09	1	7	2.22	33.7	19	0.99	3	10	33.5	10	21	8.8	140	1.8	6	8.4	5
AE-69/400.50	74.1	0.13	10.4	2.92	0.12	1.62	1.67	0.13	3.41	0.02	3.86	98.38		0.514	1.36		<1	115	505	<5	0.2	5.9	71.3	1.1	18	2.8	54	10.07	6.32	1.14	19	9.32	<1	7	2	33.1	14	0.92	3	10	33	<5	27	8.8	155	3.8	5	8.6	6
AE-69/405.2	73.78	0.23	11.05	3.95	0.1	2.19	1	0.13	3.2	0.03	3.37	99.03		0.273	1.086		<1	17	513	<5	2.3	2.7	61.7	4.4	10	2.7	198	9.59	6.25	1.01	17	8.34	1	5	2.14	28.7	29	0.96	<2	8	30.5	<5	88	7.58	118	3.1	7	7.3	6
AE-69/410.90	79.7	0.11	7.85	2.04	0.07	1.15	2.46	0.06	2.48	0.01	3.35	99.28		0.552	0.344		<1	<5	741	<5	0.9	0.6	52.4	1.4	11	2.4	17	7.96	4.75	0.8	13	7.08	1	5	1.57	24.1	11	0.69	<2	7	24.1	<5	51	6.39	103	1.3	<5	6.3	5
AE-69/421.80	71.5	0.16	12.4	3.23	0.09	1.78	1.2	0.04	4.43	0.02	4.11	98.96		0.455	0.155		<1	6	494	<5	0.5	<0,2	86.4	1.4	11	4	<10	11.93	7.28	1.24	22	10.25	2	7	2.36	40.5	16	1.1	<2	12	40.6	<5	19	10.65	145	1.2	6	10	7
AE-69/427.2	72.03	0.17	12.64	5.07	0.05	2.31	0.12	0.06	4.4	0.02	3.04	99.91		0.046	0.62		<1	36	405	<5	4.5	<0.2	96.9	10.7	<10	3.8	31	12.96	7.9	1.41	21	11.47	1	7	2.82	45.3	28	1.18	2	12	45.2	<5	14	11.87	116	2	6	10.4	13
AE-69/435.20	58.7	0.26	20.2	3.45	0.06	3.85	0.39	0.3	7.74	0.04	4.56	99.55		0.084	0.061		4	<5	324	<5	10.2	1.5	130	4.1	<10	9	46	14.44	7.64	1.98	38	14.15	2	12	2.61	57.2	68	1.25	<2	19	59.7	<5	200	15.98	204	6.3	10	14.9	16
AE-69/447.10	71.4	0.17	13.3	1.86	0.04	3.15	1.14	0.05	4.83	0.02	4.12	100.08		0.24	<0,005		<1	<5	131	<5	0.2	<0,2	84.5	1.9	11	5.6	<10	11.45	6.92	1.5	21	10.49	1	9	2.3	38	52	1.09	<2	12	39.5	<5	8	10.31	103	2.3	7	10.2	9
AE-69/460.40	52.4	1.58	17.5	8.05	0.1	3.78	2.58	2.3	6.34	0.16	5.29	100.08		0.494	<0,005		<1	<5	174	<5	<0,1	<0,2	21.5	28.6	116	12.9	<10	4.06	2.26	1.3	22	4.45	3	3	0.78	9.3	39	0.34	<2	5	13.1	32	11	3.05	120	4.1	37	3.9	2
AE-69/463.7	80.75	0.13	9.92	0.59	0.01	0.66	0.45	0.33	6.46	0.02	1.08	100.4		0.098	0.011		<1	<5	189	<5	<0.1	<0.2	32.5	<0.5	11	1.1	13	6.03	4.21	0.55	7	4.64	<1	3	1.4	14.4	<10	0.66	<2	8	14.9	<5	5	3.86	46.9	0.6	<5	3.7	2
AE-70/249.80	61.9	0.33	17.7	5.18	0.2	4.18	1.15	0.84	2.82	0.06	5.29	99.65		0.204	0.231		<1	<5	486	<5	0.3	<0,2	109	6.5	12	5.3	<10	16.21	10.1	2.01	29	13.32	2	11	3.3	44.9	103	1.63	<2	16	47.7	31	6	12.6	109	1.8	9	12.6	8
AE-70/259.60	63	0.21	16.2	6.69	0.07	3.55	1.29	0.62	3.47	0.04	3.72	98.86		0.028	<0,005		<1	10	898	<5	0.2	<0,2	119	1.6	13	6.9	<10	15.19	8.99	1.5	25	14.09	3	10	2.98	45.8	66	1.29	<2	15	50.9	<5	29	13.47	137	6.7	9	13.5	9
AE-70/269.50	75.6	0.16	12.5	1.76	0.05	1.38	0.49	2.92	2.09	0.02	2.26	99.23		0.081	<0,005		<1	<5	317	<5	<0,1	<0,2	90.5	0.9	26	3.3	<10	11.06	6.59	1.21	20	9.92	2	8	2.14	37.1	24	1.02	<2	11	37.1	8	32	9.77	77	1.2	6	9.4	8
AE-70/281.30	70.5	0.19	14.2	2.63	0.02	3	0.23	0.98	3.97	0.02	3.13	98.87		0.013	<0,005		<1	<5	619	<5	0.2	<0,2	100	1.2	<10	5.5	<10	13.29	7.77	1.33	25	12.19	2	9	2.65	45.9	44	1.2	<2	14	47.1	<5	16	12.59	126	1.5	8	12	8
AE-70/293.10	71.5	0.18	14.3	3.11	0.01	1.5	0.09	1.43	4.73	0.02	2.93	99.8		0.01	0.92		<1	11	560	<5	2	<0,2	91.8	4.2	14	4.5	26	15.92	9.45	1.41	29	12.99	2	9	3.14	42.1	24	1.37	2	13	43	<5	29	11.2	126	2.2	7	11.7	10
AGI-808/77.2	43.2	0.22	15.07	16.72	0.24	3.29	5.85	2.47	0.64	0.34	10.98	99.02		2.255	0.106		1	139	1723	5	4.7	<0.2	73.4	<0.5	<10	1.9	730	14	8.66	1.69	31	12.04	6	11	2.84	29.6	65	1.39	2	15	41.9	24	37	9.66	31.2	7.5	6	10.8	21
AGI-808/80.9	67.06	0.66	15.43	6.56	0.14	1.7	0.38	0.31	4.04	0.09	3.23	99.6		0.086	<0.005		<1	25	3046	<5	0.1	<0.2	81.3	18	71	12	<10	4.54	2.59	1.22	23	5.07	3	3	0.87	39.2	30	0.37	<2	11	32.8	51	13	8.71	206	25.3	14	6.1	3
AGI-808/84.6	64.58	0.75	16.48	7	0.22	2.7	0.27	0.89	3.21	0.1	3.58	99.78		0.067	0.029		<1	8	1330	<5	0.3	<0.2	79.1	21.8	83	8.2	197	4.77	3.03	1.23	24	4.97	4	4	0.99	38	55	0.42	<2	13	33.7	66	9	8.85	159	4	16	6.4	4
AGI-808/88.9	66.12	0.71	15.81	7.68	0.35	1.93	0.23	2.23	2.1	0.09	2.85	100.1		0.032	0.018		<1	82	531	<5	0.5	<0.2	69.9	20.9	77	3.3	46	4.22	2.59	1.2	24	4.42	3	3	0.86	35.1	55	0.36	<2	11	27.9	55	6	7.59	90.5	1.4	15	5.1	3
AGI-808/94.4	61.26	0.91	18.81	7.53	0.23	2.2	0.54	0.83	3.46	0.12	3.96	99.85		0.222	0.022		<1	39	547	<5	0.3	<0.2	97.5	20.2	108	5.4	50	5.44	3.26	1.46	26	6.23	2	4	1.14	47.1	67	0.46	<2	16	41.3	49	<5	10.87	141	1.3	16	7.8	4
AGI-888/66.9	67.82	0.21	15.58	2.69	0.03	4.39	0.59	0.55	4.04	0.02	3.96	99.88		0.154	0.007		<1	9	498	<5	0.2	<0.2	108	1.2	<10	8.1	<10	13.57	8.53	1.4	25	12.37	2	8	3	48.9	53	1.44	<2	13	50.9	<5	7	13.09	137	2.1	8	11.5	7
AGI-888/74.3	71.25	0.18	13.37	4.2	0.02	4.49	0.65	1.2	1.17	0.03	4.05	100.61		0.129	0.006		<1	8	419	<5	<0.1	<0.2	86.8	0.7	<10	3.1	<10	13.35	8.76	1.15	21	11.3	2	7	2.95	38.5	88	1.29	<2	11	40.9	<5	9	10.45	40.2	1.2	6	9.9	6
AGI-888/76.9	64.75	0.24	18.23	2.65	0.03	4.92	0.92	2.46	1.22	0.04	3.61	99.07		0.091	0.153		<1	<5	466	<5	0.6	<0.2	116	2.3	<10	3.7	11	12.14	7.18	1.6	29	12.22	2	9	2.54	50.6	106	1.36	<2	16	54.9	<5	18	14.16	40.5	1.8	9	12.6	9
AGI-888/90.3	72.4	0.19	14.52	2.7	0.02	1.36	0.33	1.28	3.54	0.03	3.24	99.61		0.062	1.729		<1	28	573	<5	0.3	<0.2	103	1.1	<10	6.3	11	14.2	8.99	1.36	22	12.49	<1	7	3.27	47.4	21	1.39	2	12	48.9	<5	19	12.37	126	3.5	7	11.3	7
AGI-888/116.0	62.41	0.21	15.68	8.74	0.03	1.01	0.05	0.4	3.93	0.03	6.65	99.14		0.027	6.677		<1	197	717	<5	4.3	0.2	90	1.3	<10	4.9	67	12.15	7.93	1.52	24	10.79	<1	8	2.62	42.1	11	1.22	4	10	44.6	<5	60	11.17	142	6.5	8	10	8
AGI-888/119.7	28.48	0.47	27.47	3.27	0.36	27.31	0.05	0.04	0.02	<0.01	12.59	100.06		0.03	0.018		<1	<5	16	<5	<0.1	<0.2	29	<0.5	<10	6.8	31	12.01	9.12	0.69	39	8.04	<1	19	2.79	11.6	339	2.02	6	27	15.9	<5	<5	3.71	1.5	1.5	16	5.6	10
AGI-888/162.5	43.55	0.3	20.07	21.66	0.18	5.08	0.47	0.4	1.34	0.18	5.56	98.79		0.068	0.019		<1	8	7329	8	5.4	<0.2	96.6	0.5	<10	3.5	62	18.95	13.15	2.67	34	14.68	3	15	4.29	35.6	170	2.49	<2	22	54.7	28	11	12.93	58.5	4.1	11	13.4	13
AGI-888/179.8	57.41	0.46	23.7	6.36	0.17	3.23	0.19	2.33	2.13	0.04	4.52	100.54		0.024	0.02		<1	23	2449	<5	<0.1	<0.2	162	8.3	<10	5.2	11	12.74	6.31	2.02	36	13.8	4	21	2.34	47.7	120	0.7	<2	27	69.6	60	27	16.56	75.9	49.2	8	15.9	12
AGI-888/180.9	61.74	0.41	19.03	6.1	0.13	2.53	0.92	1.74	2.57	0.07	4.18	99.42		0.159	0.009		<1	128	1880	<5	0.7	<0.2	173	19.3	17	8	<10	11.45	5.93	2.28	23	12.52	6	11	2.13	66.1	78	0.82	<2	19	71.6	124	36	17.98	105	88.1	11	15.4	9
AGI-888/191.5	56.01	0.72	23.01	6.87	0.2	2.65	0.28	1.71	3.97	0.06	4.25	99.73		0.047	0.007		<1	55	658	<5	0.2	<0.2	158	15.1	20	10.1	<10	15.53	7.16	3.16	32	19.16	7	18	2.84	65	94	0.87	<2	24	93.6	63	25	21.64	134	15.8	15	21.8	10
AGI-888/206.9	50.93	1.63	19.28	10.9	0.78	4.72	1.49	3.52	3.15	0.38	3.6	100.38		0.023	0.007		<1	248	263	<5	<0.1	<0.2	26.3	31.7	160	5.9	11	7.86	5.32	1.58	22	6.77	6	4	1.73	12.4	75	0.74	<2	6	19.4	23	11	4.1	64.5	2.1	35	5.3	1
AGI-888/238.7	50.09	1.59	18.39	10.79	0.27	4.99	3.08	3.34	3.04	0.38	4.33	100.29		0.257	0.009		<1	28	86	<5	<0.1	<0.2	19.8	31.4	152	4.6	<10	5.1	3.23	1.34	19	4.81	2	3	1.08	9.5	75	0.48	<2	5	14.2	26	<5	2.97	47.3	1.5	38	3.9	<1
AM-49/25.0	59.66	0.81	15.87	8.78	0.12	5.8	0.44	4.03	0.95	0.11	3.6	100.17		0.036	0.059		<1	<5	58	<5	<0.1	<0.2	38	18	98	1.1	<10	3.76	2.67	0.95	18	3.35	1	4	0.87	18.8	59	0.42	<2	7	18.2	9	<5	4.51	35.5	1.1	25	3.7	2
AM-49/61.7	62.76	0.77	14.93	6.52	0.1	4.9	1.18	3	3.04	0.1	2.91	100.21		0.039	0.116		<1	<5	463	<5	<0.1	<0.2	41.9	15.2	86	1.7	18	4.53	2.84	0.84	15	4.29	<1	4	0.98	19.6	26	0.41	<2	7	20.5	7	29	4.95	83.6	0.6	23	4.1	2
AM-49/69.2	61.79	0.57	16.16	7.08	0.28	4.39	1.54	2.56	2.6	0.07	3.52	100.56		0.138	0.02		<1	24	193	<5	1.4	<0.2	51.5	18.9	132	3	77	4.71	2.62	1.23	18	4.81	1	3	0.96	26.2	29	0.4	<2	8	24.9	39	84	6.38	126	0.4	21	5	5
AM-49/93.9	58.8	0.72	17.44	7.11	0.12	3.65	2.43	2.85	2.64	0.1	4.05	99.91		0.275	0.203		<1	16	327	<5	0.2	0.7	56.2	14.7	122	4	23	5.66	3.12	1.41	19	5.64	2	4	1.13	25.3	48	0.46	<2	9	29	27	277	7.21	104	1.1	19	5.9	2
AM-49/108.0	52.65	1.22	18.47	9.81	0.19	3.97	6.3	3.63	0.53	0.13	3.3	100.2		0.05	0.045		<1	7	113	<5	<0.1	<0.2	21	20.9	20	0.6	18	4.2	2.44	1.17	18	3.84	2	2	0.86	9.2	40	0.36	<2	5	12.6	<5	<5	2.79	16.4	1.2	31	3.1	<1
AM-49/125.1	59.15	0.81	15.63	7.07	0.14	5.08	2.79	5.78	0.2	0.1	4.1	100.85		0.478	0.261		<1	8	56	<5	<0.1	4.4	22.4	16.8	85	0.4	25	3.37	2.12	0.74	15	3.02	1	3	0.75	10.2	38	0.33	<2	4	11.9	10	370	2.79	5.7	2.2	28	2.5	1
AM-49/189.1	58.48	0.74	14.74	7.58	0.14	6.33	2.52	3.86	0.52	0.09	4.8	99.8		0.396	0.095		<1	14	54	<5	<0.1	<0.2	19.7	19.7	89	0.5	25	4.91	2.7	0.92	15	4.01	1	3	1	8.4	58	0.34	<2	4	11.5	12	<5	2.6	18.6	0.6	28	3.1	1
AM-49/240.1	45.32	1.19	16.25	9.78	0.14	12.21	3.59	3.11	1.49	0.18	7.22	100.48		0.449	<0.005		<1	<5	102	<5	<0.1	<0.2	16.2	41.6	648	1.9	<10	4.07	2.33	1.21	15	3.81	1	2	0.85	6.6	75	0.35	<2	4	12	189	<5	2.34	25.3	0.8	31	3.1	<1
AM-49/321.5	57.53	0.99	21.86	6.68	0.04	1.69	0.16	0.23	6.08	0.11	4.5	99.87		0.279	0.662		<1	51	501	<5	0.4	<0.2	92.6	25.9	133	7.3	36	5.4	3.11	1.3	26	5.83	2	5	1.08	44.4	135	0.48	<2	16	41.1	64	38	10.74	193	6.6	18	7.3	3
AM-49/509.1	69.75	0.6	14.95	5.37	0.43	1.63	0.22	0.88	2.84	0.06	3.16	99.89		0.209	0.02		<1	<5	717	<5	0.2	<0.2	80.4	18.9	76	4.4	45	4.63	2.52	1.27	21	4.94	2	3	0.9	37.9	45	0.36	<2	11	33.6	78	<5	8.93	127	0.3	13	6	2
AM-49/553.7	72.8	0.54	13.18	5.45	0.63	1.77	0.07	1.16	1.9	0.05	2.83	100.38		0.025	0.005		<1	6	434	<5	<0.1	<0.2	71.2	6.9	65	2.9	<10	3.67	2.07	1.16	18	4.21	2	2	0.74	32.7	51	0.31	<2	9	30.5	74	<5	8.08	74.1	<0.1	12	5.4	2
AM-49/558.0	74.88	0.44	11.5	5.34	0.29	1.4	0.17	1.48	2.21	0.08	2.16	99.95		0.027	0.007		<1	<5	1132	<5	0.3	<0.2	59.8	16.5	45	5.7	10	4.16	2.21	1.28	17	4.7	2	2	0.82	30.2	29	0.31	<2	7	29.7	59	25	7.52	104	2.3	12	5.5	2
AM-49/592.8	69.81	0.52	12.98	7.7	0.34	1.92	0.29	1.82	2.25	0.12	2.44	100.19		0.043	0.006		<1	6	451	<5	0.4	<0.2	67.7	19.2	52	5.7	<10	5.02	2.77	1.48	18	5.62	1	2	0.98	37.2	42	0.38	<2	5	35.7	66	45	9	101	2.2	13	6.5	3
AM-49/673.0	63.64	0.86	17.41	7.29	0.14	2.05	0.33	1.96	2.92	0.13	3.29	100.02		0.067	0.034		<1	<5	426	<5	0.3	<0.2	88.3	16.8	94	4.9	27	6.13	3.35	1.64	22	6.23	2	5	1.18	41.5	55	0.49	<2	16	39	49	29	9.93	117	0.4	16	7.1	3
AM-49/736.1	61.51	0.75	16.71	6.56	0.29	2.58	2.04	1.75	2.44	0.14	4.79	99.56		0.557	0.134		<1	19	339	<5	0.3	<0.2	72.5	17.7	78	4	39	8.67	5.03	1.48	23	8.23	2	7	1.8	32.2	82	0.73	2	13	36.9	45	15	8.69	92.2	1.1	16	8.1	4
AM-49/774.5	49.86	1.68	18.96	10.81	0.21	4.12	3.15	5.14	2.61	0.37	3.62	100.53		0.191	0.006		<1	13	103	<5	<0.1	<0.2	20.6	35.5	158	4.4	<10	6.14	3.57	1.58	20	5.83	1	3	1.29	10.7	55	0.51	<2	5	17.5	59	<5	3.58	51.6	1	38	4.6	<1
AM-49/851.40	50.7	1.46	19.4	9.79	0.2	3	2.54	1.17	5.77	0.29	5.21	99.53		0.321	<0,005		<1	18	239	<5	<0,1	<0,2	23.1	31.9	173	8.1	<10	8.87	4.74	2.57	23	9.55	2	3	1.7	23.5	40	0.58	<2	5	30.5	39	6	6.9	99.2	6	37	8	2
AM-49/872.40	67.1	0.25	15.8	2.6	0.09	4.64	0.52	0.2	4.18	0.03	4.51	99.92		0.094	<0,005		<1	13	206	<5	0.1	<0,2	120	3.4	<10	8	<10	13.32	7.23	1.43	26	12.84	2	11	2.53	49.2	83	1.11	<2	15	51.6	11	6	13.78	108	5.2	10	12.8	9
AM-49/879.75	60.2	0.33	19.1	3.51	0.03	5.64	0.52	1.07	4.43	0.05	5.16	100.04		0.091	<0,005		<1	70	240	<5	0.2	<0,2	131	4.7	<10	10	<10	17.99	10.88	1.72	34	16.11	1	13	3.58	53.4	117	1.63	<2	18	59.8	8	9	15.8	146	46.8	13	15.4	11
AM-49/885.90	45.9	1.13	14.8	6.26	0.17	1.93	14.4	5.23	0.29	0.2	10.2	100.51		2.32	<0,005		<1	33	34	<5	<0,1	0.2	29.8	24.3	74	2.2	28	6.67	3.99	1.46	23	5.88	5	5	1.32	12.3	29	0.61	<2	7	17.2	29	42	4.02	11.4	8.5	25	4.8	3
AM-49/893.60	64.1	0.24	17.8	3.44	0.02	3.9	0.56	1.45	4.16	0.03	4.25	99.95		0.094	<0,005		<1	17	555	<5	<0,1	<0,2	115	1.3	10	10.6	<10	15.37	9.2	1.8	31	14.3	2	11	3.09	51.3	81	1.34	<2	17	52.7	8	42	13.97	185	3.2	9	13.7	9
AM-49/895.00	64	0.25	18	4.28	<0,01	2.87	0.56	1.39	4.39	0.04	4.03	99.81		0.095	<0,005		<1	12	534	<5	0.2	<0,2	112	0.9	<10	11.1	<10	14.19	7.79	1.86	31	15.35	3	12	2.63	50.2	63	1.19	<2	18	57.2	11	57	14.66	195	4.3	9	15.6	10
AM-49/900.90	73.6	0.18	13.2	2.57	0.02	3.18	0.8	1.28	1.88	0.02	3.35	100.08		0.032	<0,005		<1	12	336	<5	0.2	<0,2	97.8	1.2	<10	5.3	<10	13.23	7.88	1.35	23	11.81	3	8	2.69	45.2	84	1.22	<2	12	44.2	6	52	11.94	87.3	3.1	7	11.2	8
AM-49/903.00	70.4	0.19	14.1	2.87	0.02	2.89	3.08	1.19	2.01	0.02	3.98	100.75		0.081	<0,005		<1	12	401	<5	0.2	<0,2	109	1.2	<10	5.5	<10	16.47	8.83	1.78	24	16.62	3	9	3.13	48.7	80	1.26	<2	13	51.9	7	96	13.38	94.2	3.8	7	14.7	8
AM-49/907.40	72.1	0.18	14.3	1.96	0.02	1.39	3.36	1.7	1.45	0.02	3.3	99.78		0.199	<0,005		<1	6	462	<5	0.3	0.5	96	1	18	3.9	11	13.94	8.32	1.45	24	12.45	3	9	2.81	44.2	56	1.28	<2	13	44.5	<5	89	11.66	66.6	5.8	7	11.5	9
AM-49/912.50	74.2	0.18	13.4	2.93	0.02	1.78	0.88	1.57	1.95	0.02	3.53	100.46		0.188	<0,005		<1	<5	297	<5	<0,1	<0,2	90.5	1.1	14	5.3	<10	11.69	6.89	1.36	28	11.11	3	9	2.27	42.3	61	1.04	<2	12	43.5	<5	20	11.33	83.2	3.1	7	10.8	8
AM-49/918.00	72	0.16	12.9	2.85	0.03	2.5	2.13	1.37	1.98	0.02	3.79	99.73		0.244	<0,005		<1	<5	485	<5	0.3	<0,2	96	1.1	<10	5.3	<10	13.08	7.45	1.49	24	12.65	2	8	2.54	44.2	66	1.26	<2	12	44.3	7	20	11.73	105	2.3	7	11.6	8
ATS-7/3.80	74.7	0.18	13.3	1.91	<0,01	3.17	1.43	2.46	0.37	0.02	2.76	100.3		0.037	<0,005		<1	11	267	<5	0.6	<0,2	110	52.5	<10	1.2	<10	14.41	8.19	1.61	23	13.77	2	9	2.77	53.2	62	1.25	<2	12	51.8	<5	32	13.63	13.1	2.7	7	13	8
ATS-7/12.00	70.6	0.21	15	2.46	0.01	3.59	0.95	2.38	0.87	0.03	3.73	99.83		0.091	<0,005		<1	17	414	<5	0.1	<0,2	119	0.9	<10	2.4	<10	17.46	10.6	1.63	27	14.42	2	10	3.47	55	77	1.53	<2	15	54.1	<5	11	14.61	30.7	3.3	8	13.6	9
ATS-7/40.30	80.8	0.12	9.58	2.03	<0,01	2.97	0.16	1.18	0.85	0.01	3.45	101.15		0.025	<0,005		<1	<5	265	<5	<0,1	0.3	67.7	0.9	<10	1.6	13	8.77	5.47	0.94	17	7.8	1	6	1.76	29.7	51	0.8	<2	9	31.2	<5	8	8.25	25.5	1	5	8	6
ATS-7/61.50	62.5	0.22	17.3	3.28	0.02	5.47	1.53	0.84	3.41	0.02	4	98.59		0.054	0.603		<1	11	324	<5	0.5	21.5	118	2.7	<10	6.8	60	15.99	9.38	1.67	31	14.77	2	12	3.19	52.7	84	1.79	<2	17	56.1	<5	347	14.04	103	10.7	9	14.6	19
ATS-7/76.50	66.6	0.25	18.9	1.9	<0,01	1.02	0.13	4.89	3.98	0.03	2.61	100.31		0.016	0.537		<1	5	249	<5	0.7	<0,2	142	5.4	<10	3.9	<10	16.93	10.68	2.35	44	15.13	2	12	3.47	66.4	<10	1.73	7	18	65.8	<5	12	17.55	101	2.5	10	16	9
ATS-7/84.6	75.14	0.19	13.33	2.16	<0.01	0.9	0.45	3.5	3.05	0.03	1.86	100.61		0.097	0.03		<1	<5	235	<5	0.2	<0.2	104	1.4	<10	4.3	17	10.54	6.95	1.7	24	9.74	1	7	2.41	43.3	<10	1.14	<2	12	48.9	<5	6	12.85	77.9	1.8	7	10.8	6
ATS-7/103.60	74.6	0.16	12.8	2.2	0.01	3.61	0.37	1.22	1.41	0.01	3.49	99.88		0.059	<0,005		<1	<5	366	<5	<0,1	<0,2	85.7	1.2	<10	2.9	<10	14.29	8.49	1.36	23	11.99	1	8	2.78	38.2	65	1.21	<2	12	40.3	<5	7	10.68	43.5	1	6	10.7	8
ATS-7/110.9	70.18	0.19	14.84	2.86	0.02	4.85	0.16	1.07	2.2	0.03	3.63	100.03		0.039	0.007		<1	7	361	<5	<0.1	<0.2	102	1.3	<10	4.4	<10	14.21	9.32	1.32	23	11.99	1	7	3.19	45.5	86	1.35	<2	11	47	<5	<5	12.03	62.7	2.4	7	11.1	7
ATS-7/120.20	71.6	0.18	14.2	2.5	0.01	4.49	0.07	1.01	2.2	0.02	3.68	99.96		<0,005	<0,005		<1	7	396	<5	<0,1	<0,2	95.5	25.7	<10	4.5	<10	16.44	10.05	1.56	24	13.02	<1	9	3.33	42.8	71	1.41	<2	13	45.1	<5	5	12.05	77.8	1.9	7	11.2	8
ATS-7/132.1	76.49	0.15	11.48	1.73	0.01	0.24	0.84	5.98	0.37	0.02	0.74	98.05		0.032	0.01		<1	5	22	<5	0.5	<0.2	71.6	0.6	13	0.6	12	8.75	5.63	0.79	16	7.55	2	6	1.96	32.9	<10	0.83	<2	9	32.5	<5	12	8.57	11	2.4	5	7.3	5
ATS-7/138.50	76.1	0.17	12.9	1.31	<0,01	0.32	0.18	2.16	6.46	0.02	1.13	100.75		0.024	<0,005		<1	5	421	<5	0.8	<0,2	86.6	0.8	34	2.2	<10	12.69	7.76	1.3	21	11.1	1	8	2.55	40.4	<10	1.19	2	11	40.6	21	10	10.7	143	1	7	10.2	14
ATS-7/158.60	75.2	0.15	11.8	1.1	0.01	0.2	0.33	3.52	4.85	0.02	0.887	98.067		0.035	0.067		<1	<5	463	<5	0.2	<0,2	84.3	1.3	38	1.7	<10	14.4	9.46	1.25	20	11.45	1	8	3.03	39	<10	1.52	3	11	38.9	<5	15	10.31	129	1	7	10.1	8
ATS-7/179.60	73.3	0.16	13.1	2.3	0.03	0.73	0.46	1.58	6.22	0.02	1.88	99.78		0.067	<0,005		<1	<5	455	<5	0.2	<0,2	87.6	0.6	<10	3.2	<10	9.93	4.38	1.34	23	10.44	2	8	1.68	40.1	17	0.51	<2	12	39.8	<5	15	10.72	165	1.7	7	10.4	8
ATS-7/196.80	75.4	0.15	12.4	1.85	0.03	0.25	0.55	1.96	5.89	0.02	1.45	99.95		0.082	<0,005		<1	<5	511	<5	0.1	<0,2	84.4	0.6	13	2.4	<10	12.36	7.05	1.29	21	11	2	8	2.43	38.7	<10	1.01	<2	11	38.9	<5	12	10.34	179	1.1	6	10.2	6
ATS-7/222.40	75	0.15	11.7	1.91	0.04	0.54	1.49	1.93	4.91	0.02	2.28	99.97		0.249	<0,005		<1	<5	492	<5	0.2	<0,2	83.8	0.6	19	2.9	<10	8.11	4.09	1.24	17	8.79	2	7	1.47	35.6	11	0.57	<2	11	35.8	<5	9	9.53	104	1.1	<5	8.9	6
ATS-7/229.2	74.11	0.16	12.48	2.18	0.03	1.51	1.2	2.79	3.36	0.03	2.13	99.98		0.147	0.007		<1	8	339	<5	0.2	<0.2	84.7	0.7	<10	5.7	<10	11.49	7.84	1.19	20	9.61	2	6	2.69	39.5	32	1.22	<2	11	38.8	<5	13	10.26	87.6	3	6	9.3	6
ATS-7/243.30	61.9	0.25	20.1	2.55	0.01	2.31	0.28	3.35	6.02	0.03	3.12	99.92		0.042	<0,005		<1	<5	588	5	0.1	<0,2	113	1.9	<10	8.6	<10	15.96	9.47	1.79	40	13.71	2	12	3.1	49.6	46	1.38	<2	19	51.8	<5	5	14.04	197	2.4	11	13.3	11
ATS-7/265.40	82	0.11	8.28	1.93	0.01	3.31	0.27	0.33	1.54	0.01	2.62	100.41		0.025	<0,005		<1	6	238	<5	0.2	<0,2	67.1	1.3	11	2.7	<10	10.74	6.85	0.93	15	8.87	<1	5	2.22	32	56	0.95	<2	7	31	<5	6	8.31	57.7	1	<5	7.8	5
ATS-7/279.20	68.8	0.19	14.4	2.85	0.01	4.84	0.48	0.58	3.62	0.02	4.07	99.86		0.09	<0,005		<1	<5	153	<5	0.2	<0,2	91	2.3	<10	6.2	<10	11.59	7.74	1.35	25	9.91	2	9	2.36	39.5	66	1.39	<2	13	41.1	<5	7	11.05	133	0.8	8	10.2	8
ATS-7/301.10	76.5	0.16	11.4	1.9	0.01	0.55	0.36	2.22	5.1	0.02	1.43	99.65		0.081	<0,005		<1	<5	271	<5	0.1	<0,2	78.9	0.9	23	2.6	<10	11.2	6.54	1.13	20	10.15	2	7	2.17	36.5	12	0.99	<2	11	36.9	<5	11	9.74	152	0.7	6	9.4	6
ATS-7/320.80	77.5	0.16	11.8	1.67	0.01	0.26	0.56	3.83	3.01	0.02	1.58	100.4		0.114	<0,005		<1	<5	258	<5	<0,1	<0,2	72.8	0.8	26	1.6	<10	8.05	4.31	1.05	19	8.1	1	7	1.48	32.5	<10	0.62	2	10	31.2	<5	9	8.46	98.5	0.4	6	7.9	7
ATS-7/344.40	50.9	1.51	18.5	10.6	0.14	2.23	7.52	4.53	0.85	0.44	2.8	100.02		0.041	<0,005		<1	16	89	<5	<0,1	<0,2	37.9	30.6	121	1.7	<10	9.07	5.3	1.98	21	8.24	2	6	1.8	16.3	51	0.79	<2	8	22.8	39	12	5.32	29.9	2.2	36	6.8	3
ATS-7/376.7	46.53	1.19	15.71	8.69	1.84	4.66	7.51	6.29	0.29	0.15	7.34	100.2		1.441	0.008		<1	11	56	<5	<0.1	<0.2	14.1	26.2	113	0.7	<10	3.89	2.31	1.08	15	3.48	2	2	0.79	5.5	81	0.3	<2	3	10.2	28	<5	2.09	6.4	0.7	28	2.8	<1
ATS-7/387.5	67.19	0.19	15.85	2.97	0.09	4.12	1.16	0.88	4.23	0.03	3.27	99.98		0.025	<0.005		<1	<5	368	<5	0.3	<0.2	119	1	<10	7.3	<10	17.11	10.18	1.71	27	16.46	1	9	3.68	53.6	112	1.51	<2	16	60.4	<5	14	15.23	102	0.2	10	14.8	8
ATS-7/402.7	63.85	0.21	18.64	2.37	0.15	3.28	0.65	3.94	3.98	0.03	2.76	99.86		0.033	<0.005		<1	<5	400	<5	0.1	<0.2	105	9.6	<10	6	<10	15.59	9.49	1.77	28	13.07	1	11	3.36	43.9	70	1.6	<2	17	55.9	7	10	13.34	102	0.1	11	12.2	9
ATS-7/429.3	72.7	0.15	13.68	2.3	0.04	1.76	2.29	2.68	2.54	0.02	2.1	100.26		0.034	0.192		<1	26	286	<5	2.8	<0.2	83.7	1.9	12	3.3	315	11.99	7.88	1.18	23	9.77	2	7	2.72	37.5	56	1.25	<2	14	39.4	<5	47	10.36	92.4	3.7	8	9.2	8
DST-332/251.5	77.39	0.08	6.2	9.63	0.1	3.8	<0.01	<0.01	0.06	0.01	2.64	99.91		0.021	0.327		<1	14	90	<5	3.5	<0.2	39.1	23.8	<10	0.2	1564	6.59	4.26	0.42	11	5.6	1	3	1.43	18	27	0.58	<2	4	20	<5	<5	4.99	2.1	2.8	<5	4.9	4
DST-332/275.9	78.44	0.12	9.42	3.8	0.04	3.52	<0.01	0.09	1.88	0.01	2.58	99.9		0.021	0.11		<1	5	334	<5	0.5	<0.2	56.4	5.5	<10	0.8	<10	8.16	5.25	0.7	13	6.84	<1	4	1.8	25.4	44	0.76	<2	6	27.2	<5	<5	6.87	59.9	1.4	<5	6.3	14
MU-2/890.00	57.6	0.8	19.3	6.73	1.45	1.64	0.5	0.24	6.81	0.13	4.57	99.77		0.192	<0,005		<1	20	753	<5	0.3	<0,2	87	53.8	84	18.8	<10	5.94	3.47	1.52	32	6.46	3	5	1.18	41.9	28	0.55	<2	18	36.2	86	12	10.34	289	13.6	19	7.7	5
MU-2/892.70	53.4	1.1	19.3	8.6	0.37	3.87	2.67	7.15	0.45	0.17	3.39	100.47		0.069	<0,005		<1	<5	119	<5	0.1	<0,2	66.9	24.5	184	2.2	12	13.52	8.06	2	23	11.95	2	11	2.65	27	55	1.14	<2	13	36.8	54	8	8.89	17.3	3.1	27	10.3	6
MU-2/895.50	57.3	0.93	17.7	6.37	0.19	2.85	4.98	6.52	0.2	0.17	2.93	100.14		0.129	<0,005		<1	<5	90	<5	<0,1	<0,2	58.1	19.1	164	0.9	12	11.37	7.31	1.65	20	10.22	2	10	2.33	25.6	34	1.08	<2	11	31.2	43	8	7.78	7.3	2.9	23	8.6	5
MU-2/898.65	52.1	1.16	20	8.99	0.11	2.97	2.9	5.18	2.19	0.17	4.45	100.22		0.236	<0,005		<1	<5	257	<5	<0,1	<0,2	70.3	28.5	180	5.6	<10	12.12	7.55	1.71	28	10.74	2	11	2.43	30.2	49	1.2	<2	13	37.4	59	13	9.14	79.4	11.5	25	10	6
MU-2/902.50	45.2	1.23	21.3	10.3	0.23	4.4	4.14	2.39	4.21	0.2	6.43	100.03		0.479	<0,005		<1	<5	521	<5	<0,1	<0,2	69.6	33.3	239	9.7	<10	14.49	8.91	2.03	33	13	3	12	2.97	29.6	64	1.35	<2	13	37.6	86	13	9.19	155	3.9	31	10.5	7
MU-2/913.95	49.9	1.07	18.6	7.72	0.28	3.01	11.3	3.74	0.14	0.17	4.05	99.98		0.276	<0,005		<1	<5	25	<5	0.1	<0,2	60.9	33.3	182	1.3	14	12.26	7.63	1.76	31	10.56	3	10	2.5	25.9	46	1.13	<2	11	32.6	77	26	8.18	5.5	3.3	28	9.3	5
MU-2/917.10	58	0.33	20.1	3.73	0.06	5.38	0.31	0.45	6.51	0.06	4.77	99.7		0.025	<0,005		<1	9	625	<5	<0,1	<0,2	138	6.5	<10	17.3	<10	19.87	11.14	1.72	34	17.13	<1	14	3.8	57.3	109	1.51	<2	20	60.8	18	7	16.6	248	2.9	13	16	13
MU-2/919.90	55	0.82	18.7	7.28	0.2	3.88	3.58	6.85	0.49	0.08	3.74	100.62		0.207	<0,005		<1	<5	61	<5	0.1	<0,2	77.8	21.4	148	1.7	<10	14.78	8.65	1.71	27	12.92	2	13	2.93	34.2	71	1.25	<2	14	39.9	56	14	10.05	18.1	4.3	21	11.6	7
MU-2/925.30	69.8	0.2	14.3	3.37	0.08	1.59	4.35	0.69	2.72	0.03	3.02	100.15		0.087	<0,005		<1	<5	306	<5	0.5	<0,2	171	8.1	31	6	<10	15.2	9.39	1.34	20	13.47	1	12	3.07	63.1	32	1.35	<2	18	58	22	22	15.78	107	3.4	7	13.7	9
MU-2/931.30	72.1	0.17	13	2.47	0.08	2.2	3.48	0.68	2.4	<0,01	3.19	99.77		0.115	<0,005		<1	<5	285	<5	0.3	<0,2	115	1.5	20	4.7	<10	16.18	9.78	1.26	25	14.33	1	10	3.25	51.1	38	1.46	<2	16	53.2	7	24	14.18	92.6	3.6	8	13.3	10
MU-5/837.30	67.6	0.54	14.4	4.17	0.06	1.86	2.22	6.6	0.25	0.08	2.8	100.58		0.211	<0,005		<1	<5	78	<5	<0,1	0.4	71.4	12	82	0.7	26	12.19	7.48	1.37	21	10.54	1	11	2.46	30.2	22	1.16	<2	12	36.2	31	7	9.24	8.2	1.2	13	9.9	7
MU-5/848.25	70.62	0.2	14.72	2.54	0.07	2.3	3.02	1.3	3.03	0.04	2.42	100.26		0.037	0.007		<1	<5	311	<5	0.4	<0.2	108	1.4	<10	6.3	15	13.98	8.84	1.27	22	11.68	2	8	3.15	48.1	50	1.35	<2	13	49.2	<5	19	13.32	113	2.6	9	11.5	8
MU-5/858.0	64.78	0.35	17.78	4.16	0.06	1.57	2.48	5.13	1.89	0.07	1.84	100.11		0.042	0.006		<1	<5	187	<5	0.2	<0.2	97.2	2.5	19	4.1	<10	11.77	6.8	2.52	22	11.3	2	8	2.48	45.6	46	0.99	<2	13	48	<5	15	12.86	68.3	1	13	11.4	3
MU-5/863.0	71.4	0.21	14.12	3.23	0.07	1.55	3.99	0.97	2.4	0.03	2.12	100.09		0.025	0.01		<1	<5	324	<5	0.1	<0.2	84.2	1.3	<10	3.4	13	15.07	9.77	1.59	19	11.97	1	9	3.52	37.3	42	1.44	<2	13	42.8	<5	11	11.04	82.1	1	<5	10.8	5
MU-5/866.45	71.11	0.23	14.35	3.29	0.05	1.64	1.51	2.82	3.07	0.03	1.89	99.99		0.017	<0.005		<1	<5	302	<5	<0.1	<0.2	86.7	1.2	<10	5.1	<10	14.26	8.94	1.84	22	11.59	2	10	3.24	37.8	47	1.44	<2	13	43.3	<5	9	11.09	124	0.9	7	10.7	6
MU-5/870.75	80.6	0.3	8	4.6	0.07	0.98	1.31	0.13	2.92	0.04	2.12	101.07		0.075	<0,005		<1	20	394	<5	0.7	<0,2	56.5	9.1	33	6.2	<10	4.84	2.79	0.96	14	4.99	3	2	0.95	28	30	0.4	<2	9	23.6	21	37	6.47	135	3.2	7	5.3	4
MU-5/871.30	54.6	0.3	22.7	3.61	0.1	4.39	0.52	1.91	7.13	0.03	5.1	100.39		0.033	<0,005		<1	5	728	5	0.2	<0,2	110	6.3	<10	15.6	<10	15.15	8.36	1.28	39	12.7	2	15	2.85	38.2	99	1.23	<2	20	43.5	33	11	11.69	318	3.3	12	11.5	12
MU-5/873.15	65.5	0.24	17.9	2.86	0.06	1.99	0.91	1.99	5.25	0.02	3.13	99.85		0.025	<0,005		<1	<5	654	<5	0.2	<0,2	129	2.3	16	9.8	<10	19.05	11.44	1.81	31	16.22	2	12	3.82	58.1	37	1.7	<2	17	58.1	9	13	15.52	232	2.1	10	15.2	10
MU-5/875.25	66.6	0.24	18.8	2.53	0.02	0.96	0.31	2.17	5.43	0.02	3	100.08		0.024	<0,005		<1	<5	695	<5	<0,1	<0,2	118	1.7	12	8.6	<10	16.64	10.1	1.43	32	13.85	2	12	3.31	53.4	17	1.46	<2	17	52.3	12	12	14.09	232	2	9	13	10
MU-5/876.65	73.5	0.18	13.9	2.14	0.03	0.76	1.25	4.08	2.2	0.01	1.94	99.99		0.061	<0,005		<1	<5	378	<5	0.3	<0,2	97	1.4	10	3.9	<10	12.01	6.83	1.38	21	11.86	2	9	2.31	43.6	16	1.08	<2	13	43.5	<5	20	11.71	101	2	7	11.3	8
[truncated: 73 more columns]

## Sheet: Quality control
				Analyses of reference materials as provided by SGS, with certified values (* indicates a value which is not certified) and calculated averages (Avg.), standard deviation (STD) and relative standard deviation (RSTD)
Reference material				BCS-CRM-313/2		NCS DC 11003A		OREAS 20a		OREAS751		OREAS 70b				SY-4											OREAS 602		OREAS 681							OREAS682		OREAS 920			RTS-3a		DC73025		GS311-9		GTS-2A
				Measured	Certified	Measured	Certified	Measured	Certified	Measured		Measured			Certified	Measured							Certified	Avg.	STD	RST (%)	Measured	Certified	Measured			Certified	Avg	STD	RSTD (%)	Measured	Certified	Measured		Certified	Measured	Certified	Measured	Certified	Measured	Certified	Measured
# of analysis				#1		#1		#1		#1	#2	#1	#2	#3		#1	#2	#3	#4	#5	#6	#7					#1		#1	#2	#3					#1		#1	#2		#1		#1		#1		#1	#2	#3
Date of analysis	Detection limit	UNITS		2018-12-01		2018-12-01		2018-12-01		2020-10-01		2019-08-01	2020-10-01	2020-10-01		2018-12-01	2018-12-01	2019-08-01	2019-08-01	2019-08-01	2019-08-01	2020-10-01					2018-12-01		2019-08-01	2019-08-01	2020-10-01					2019-08-01		2019-08-01	2019-08-01		2018-12-01		2019-08-01		2018-12-01		2019-08-01	2019-08-01	2019-08-01
SiO2	0.01	%		99.8	99.73	0.11	0.098	64.2	64.485	71.57	71.4316	48.51		48.28	47.9654		49.9	50.34	49.86	49.97			49.9	50.0175	0.219754	0.439354
TiO2	0.01	%		0.02	0.0243	<0,01		0.82	0.828	0.24	0.243134	0.3		0.29	0.296202		0.29	0.29	0.29	0.29			0.287	0.29	0	0
Al2O3	0.01	%		0.06	0.068	0.08	0.083	15.3	15.2827	15.92	15.8755	7.21		7.19	7.18997		20.7	20.93	20.65	20.61			20.69	20.7225	0.143149	0.690791
Fe2O3	0.01	%		0.02	0.0229	0.02	0.024	5.3	5.3288	2.42	2.39677	8.01		7.85	7.87923		6.19	6.26	6.23	6.24			6.21	6.23	0.0294392	0.472539
MnO	0.01	%		<0,01	0.00032	<0,01	0.061	0.07	0.0704467		0.0887578	0.15			0.148202		0.11	0.11	0.11	0.11			0.108	0.11	0	0
MgO	0.01	%		<0,01	0.0038	21	21.9	2.41	2.39628	0.5	0.507022	22.88		22.56	22.4573		0.56	0.57	0.56	0.57			0.54	0.565	0.0057735	1.02186
CaO	0.01	%		0.01	0.016	31.4	31.49	3.57	3.60742	1.08	1.06018	4.36		4.36	4.29828		8.05	8.07	8.02	8.01			8.05	8.0375	0.0275379	0.342617
Na2O	0.01	%		<0,01	0.0057	0.03	0.017	2.72	2.72618	3.45	3.4225	1.03		1.04	0.999871		7.18	7.21	7.17	7.15			7.1	7.1775	0.025	0.348311
K2O	0.01	%		0.01	0.0108	<0,01	0.003	4.04	3.9975	2.93	2.91827	0.7		0.72	0.704349		1.67	1.67	1.66	1.67			1.66	1.6675	0.005	0.29985
P2O5	0.01	%		<0,01	0.00220*	<0,01	0.0016	0.23	0.230682	0.29	0.280118	0.06		0.05	0.0546652		0.12	0.13	0.14	0.13			0.131	0.13	0.00816497	6.28074
LOI	-10	%				47.8	46.71	0.648	0.610983	0.696	0.696274	6.69		6.69	6.69		4.57	4.56	4.56	4.56			4.56	4.5625	0.005	0.109589
C	0.005	%																																									1.757	1.8	0.242	0.22	2.062	2.051	2.052
S	0.005	%																																											2.1	1.98	0.318	0.328	0.329
Ag	1	ppm											<1		*<1	<1	<1						0.6*				109	119.582	<1	<1	<1	*<0,5				<1	*<1	<1	<1	*<1	9	11.1
As	5	ppm											130		143.057	<5	<5						0.1 - 2*				705	649.372	<5	<5	<5	*<100				<5	*<100	5	<5	< 5	25	18.2
Ba	10	ppm											199		202.168	337	316						340	326.5	14.8492	4.54801	6760		398	431	432	429.056	420.333	19.3477	4.60294	358	376.472	507	539	559.875	121	106
Be	5	ppm											<5		*1,5	<5	<5						2.6				<5	0.801254	<5	<5	<5	1.84333				<5	*1,36	<5	<5	< 3	<5
Bi	0.1	ppm											1		*<2	<0,1	<0,1						0.1 - 0.3*				61.1	57.1541	<0.1	<0.1	<0,1	*0,097				<0.1	*0,1	0.7	0.5	< 0.8	33.8	31.3
Cd	0.2	ppm											0.3		*<2	<0,2	<0,2						0.1 - 2*				27.7	24.7065	<0.2	<0.2	<0,2	*<10				<0.2	*<10	<0.2	<0.2	< 0.2	9.8	9.21
Ce	0.1	ppm											30.2		27.4589	124	126						122	125	1.41421	1.13137	34.8	32.133	41.4	40.3	43.3	41.3381	41.6667	1.51767	3.64242	34.1	*36,3	93.8	90.8	92.7073	26.1
Co	0.5	ppm											83.5		83.2091	2.7	2.6						2.8	2.65	0.0707107	2.66833	10.8	9.89923	51.5	50.5	52.8	53.5882	51.6	1.15326	2.23499	50.4	51.9738	16.4	14.8	16.1469	156	143
Cr	10	ppm											1247		1251.59	<10	<10						12				36	32.2181	2219	2322	2285	2252.2	2275.33	52.176	2.29311	3690	3701.34	112	104	101.419	184
Cs	0.1	ppm											3.5		3.37473	1.7	1.8						1.5	1.75	0.0707107	4.04061	3	2.72553	4.2	4.1	4.3	4.01667	4.2	0.1	2.38095	3.5	3.57143	8.9	8.5	8.98389	0.4
Cu	10	ppm											50		51.8315	<10	<10						7				5060		257	248	280	272.333	261.667	16.5025	6.3067	247	261.145	107	99	113.151	2352	2353
Dy	0.05	ppm											1.75		1.9202	19.81	20.14						18.2	19.975	0.233345	1.16819	1.51	1.30871	3.23	3.32	3.19	3.49212	3.24667	0.0665833	2.05082	2.69	2.91625	6.31	6.23	6.33355	3.79
Er	0.05	ppm											1.04		1.18237	14.47	14.85						14.2	14.66	0.268701	1.83288	0.72	0.64488	1.84	1.88	1.87	1.95488	1.86333	0.0208167	1.11717	1.56	1.62258	3.64	3.46	3.73867	2.01
Eu	0.05	ppm											0.53		0.537568	2.01	2.13						2	2.07	0.0848528	4.09917	0.5	< 1.5	1.29	1.39	1.37	1.41575	1.35	0.052915	3.91963	1.08	1.24683	1.44	1.49	1.59462	1.1
Ga	1	ppm											9		9.70709	39	40						35	39.5	0.707107	1.79014	24	20.6418	19	17	17	17.9875	17.6667	1.1547	6.53604	18	18.2915	21	19	20.9764	46
Gd	0.05	ppm											1.73		1.92851	14.94	15.23						14	15.085	0.205061	1.35937	2	2.13213	3.78	3.93	3.86	4.29286	3.85667	0.0750555	1.94612	3.24	3.65944	6.69	6.66	7.38642	4.23
Ge	1	ppm											1		*2	1	1						1.0 - 4.0*	1	0	0	5	< 5	2	1	2	*1,74	1.66667	0.57735	34.641	1	*1,8	2	2	*2,04	15
Hf	1	ppm											2		*1,93	12	11						10.6	11.5	0.707107	6.14875	4	2.52784	2	2	2	*2,00	2	0	0	2	*2,0	7	7	7.5041	2
Ho	0.05	ppm											0.33		0.406816	4.32	4.49						4.3	4.405	0.120208	2.7289	0.26	0.22833	0.69	0.68	0.63	0.643611	0.666667	0.0321455	4.82183	0.57	0.549667	1.26	1.29	1.33742	0.69
In	0.2	ppm											<0,2		*<0,2	<0,2	<0,2						0.04 - 0.1*				6	5.22623	<0.2	<0.2	<0,2	*<0,2				<0.2	*<0,2	<0.2	<0.2	< 0.2	1.8
La	0.1	ppm											17.2		15.5133	58.8	59.5						58	59.15	0.494975	0.836813	18.8	16.27	19.4	18.8	20.5	18.953	19.5667	0.862168	4.40631	16	17.3323	46.9	45.3	47.7207	10.8
Li	10	ppm											36		35.3178	38	39						37	38.5	0.707107	1.83664	22	20.136	16	15	13	13.9333	14.6667	1.52753	10.4149	13	12.7619	29	29	27.7667	14
Lu	0.05	ppm											0.15		*0,2	2.12	2.22						2.1	2.17	0.0707107	3.25856	0.13	0.100673	0.26	0.26	0.25	0.2574	0.256667	0.0057735	2.24942	0.23	0.219048	0.53	0.5	0.564767	0.29
Mo	2	ppm											3		*2,96	<2	<2						0.2 - 3*				5	4.40824	<2	<2	<2	*1,77				<2	*2,91	<2	<2	< 1	3
Nb	1	ppm											4		3.26679	15	15						13	15	0	0	8	6.93425	6	6	6	5.87917	6	0	0	5	5.16042	16	15	17.1718	5
Nd	0.1	ppm											11		11.3205	55.8	56.4						57	56.1	0.424264	0.756264	13.1	13.4728	20.9	22.3	22.7	21.8973	21.9667	0.945163	4.30272	17.4	19.4238	40.8	41.3	41.0095	14.7
Ni	5	ppm											2306		2219.62	5	8						9	6.5	2.12132	32.6357	57	60.4785	475	481	502	517.963	486	14.1774	2.91717	532	572.112	36	37	44.0386	61	61.3
Pb	5	ppm											14		13.2063	12	11						10	11.5	0.707107	6.14875	1148	1022.38	12	11	10	*<20	11	1	9.09091	9	10.0889	24	26	22.8588	217	209
Pr	0.05	ppm											3.27		3.13427	14.98	15.47						15	15.225	0.346482	2.27575	3.84	3.76431	5.26	5.15	5.69	5.26242	5.36667	0.285365	5.31737	4.3	4.65905	10.73	10.68	11.2735	3.52
Rb	0.2	ppm											32.9		33.6876	58.9	59.6						55	59.25	0.494975	0.8354	30.8	27.651	80.9	79.4	80.9	82.3093	80.4	0.866025	1.07715	65.8	71.8319	168	172	178.504	13.7
Sb	0.1	ppm											0.5		*<2	<0,1	<0,1						0.01 - 0.3*				82.7	79.3439	0.3	<0.1	0.2	*0,25	0.25	0.0707107	28.2843	0.2	*0,26	1.4	1.2	< 2	3.1
Sc	5	ppm											11		*11,1	<5	<5						1.1				<5	4.18373	26	26	25	26.5667	25.6667	0.57735	2.24942	22	21.375	13	12	*15,2	16
Sm	0.1	ppm											2		1.99931	13.5	13.5						12.7	13.5	0	0	2.6	2.42438	4.3	4.4	4.8	4.6425	4.5	0.264575	5.87945	3.6	4.03371	8	7.6	7.86229	4.1
Sn	1	ppm											1		*1,05	8	9						7.1*	8.5	0.707107	8.3189	9	5.7998	2	2	2	*2,16	2	0	0	1	*2,05	5	4	< 6	273
Sr	10	ppm											72		72.3625	1105	1147						1191	1126	29.6985	2.63752	485	464.298	467	467	464	469.556	466	1.73205	0.371685	457	454.858	83	81	82.0061	48	44.7
Ta	0.5	ppm											<0,5		*0,36	0.9	0.9						0.9	0.9	0	0	0.6	< 1	<0.5	<0.5	<0,5	*0,45				<0.5	*0,45	1.3	1.4	1.4414	<0,5
Tb	0.05	ppm											0.28		0.31632	2.79	2.84						2.6	2.815	0.0353553	1.25596	0.28	0.259893	0.56	0.55	0.57	0.588148	0.56	0.01	1.78571	0.46	0.501296	1.01	1.04	1.1239	0.61
Th	0.1	ppm											7.3		6.44553	1.4	1.4						1.4	1.4	0	0	8.1	6.85658	6.3	5.8	6.6	6.38571	6.23333	0.404145	6.48361	5.7	5.51708	19.7	18.2	19.5469	1.3
Tl	0.5	ppm											<0,5		*0,35	<0,5	<0,5						0.2 - 0.5*				1.9	1.71242	<0.5	<0.5	<0,5	*<0,5				<0.5	*<0,5	0.9	0.7	0.940246	4.5
Tm	0.05	ppm											0.15		0.182991	2.42	2.49						2.3	2.455	0.0494975	2.01619	0.12	99.0541	0.26	0.27	0.25	0.259792	0.26	0.01	3.84615	0.21	0.229	0.51	0.55	0.568125	0.29
U	0.05	ppm											1.73		1.86969	0.75	0.89						0.8	0.82	0.0989949	12.0726	2.8	2.54109	1.5	1.32	1.41	1.44	1.41	0.09	6.38298	1.29	1.35733	4.02	3.7	3.96113	0.34
V	5	ppm											68		69.109	<5	<5						8				35	33.1049	259	254	260	257.237	257.667	3.21455	1.24756	228	231.499	95	91	99.8879	109
W	1	ppm											4		*4,66	<1	<1						0.2 - 15*				14	12.1026	1	<1	<1	*1,47				1	*1,23	3	3	< 5	5
Y	0.5	ppm											10.2		10.6664	122	123						119	122.5	0.707107	0.57723	6.9	6.18318	18.2	18.3	18	17.8872	18.1667	0.152753	0.84084	14.6	15.3511	33.6	33.5	34.5204	18.3
Yb	0.1	ppm											1		1.15776	16.1	15.8						14.8	15.95	0.212132	1.32998	0.7	0.65688	1.7	1.7	1.7	1.7585	1.7	0	0	1.4	1.50771	3.5	3.2	3.55146	1.8
Zn	5	ppm											112		107.145	101	96						93	98.5	3.53553	3.58937	3988	4188.46	84	90	86	91.7357	86.6667	3.05505	3.52506	74	89.7963	122	122	122.28	3069	2890
Zr	0.5	ppm											65.6		67.4145	546	544						517	545	1.41421	0.259489	132	78.7876	72.6	62.7	76.8	*83	70.7	7.23948	10.2397	63.2	*70	257	241	*250	75.5
[truncated: 24 more columns]
